# Supplementary material for: Common and specific gene signatures among three different endometriosis subtypes
Source: PeerJ journal article supplement (doi:10.7717/peerj.8730), 2020-03-05

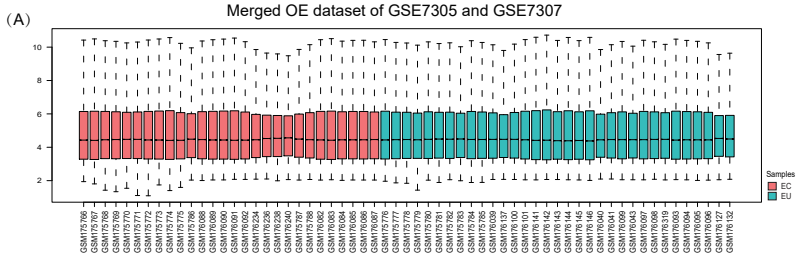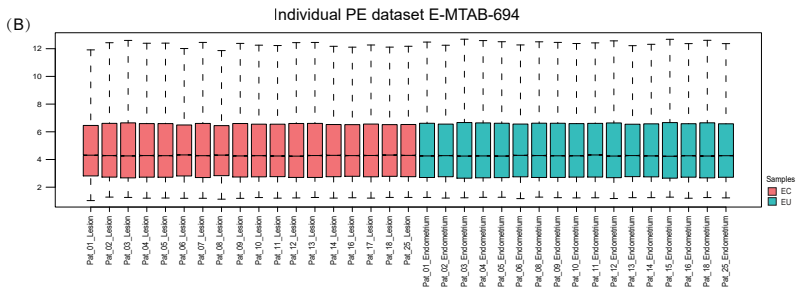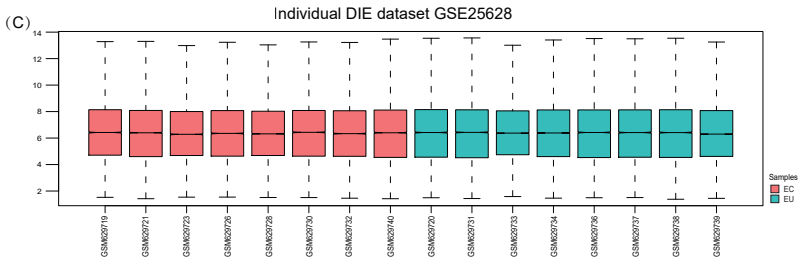

Supplement: 05-Figure-S1-boxplot.pdf [file 05-Figure-S1-boxplot.pdf]
