# Supplementary material for: Common and specific gene signatures among three different endometriosis subtypes
Source: PeerJ. 2020 Mar 5;8:e8730. doi: 10.7717/peerj.8730 (PMC7060988; doi:10.7717/peerj.8730)
Supplement: Table S1 — Left to right: Patient I.D. (n=19), age in years (mean = 34.32 ± 7.6 years); stage of endometriosis peritoneal lesion according to the American Fertility Society [AFS] classification; menstrual cycle phase according to Materials and Methods in original article DOI: 10.1177/1933719112451147; tissues analyzed; (+, available; −, not available). [file peerj-08-8730-s001.xlsx]

## Sheet: Sheet1
Supplementary Table S1. Clinical characteristics of patients with peritoneal endometriosis (PE) in E-MTAB-694
Patient I.D.	Age [yr]	rAFS stage	Menstrual phase	Peritoneal Lesion	Endometrium
1	40	IV	Proliferative	+	+
2	43	I	Secretory	+	+
3	33	I	Proliferative	+	+
4	23	II	Secretory	+	+
5	29	IV	Proliferative	+	+
6	25	I	Secretory	+	+
7	36	III	Secretory	+	--
8	52	I	Secretory	+	+
9	30	IV	Proliferative	+	+
10	30	II	Proliferative	+	+
11	37	I	Secretory	+	+
12	35	I	Proliferative	+	+
13	35	I	Secretory	+	+
14	38	I	Secretory	+	+
15	29	II	Proliferative	--	+
16	33	II	Secretory	+	+
17	21	I	Proliferative	+	--
18	47	I	Proliferative	+	+
25	36	IV	Secretory	+	+
Left to right: Patient I.D. (n=19), age in years (mean = 34.32 ± 7.6 yr); stage of endometriosis peritoneal lesion according to the American Fertility Society [AFS] classification; menstrual cycle phase according to Materials and Methods in original article DOI: 10.1177/1933719112451147; tissues analyzed; (+ = available; -- = not available).
