# Supplementary material for: Common and specific gene signatures among three different endometriosis subtypes
Source: PeerJ. 2020 Mar 5;8:e8730. doi: 10.7717/peerj.8730 (PMC7060988; doi:10.7717/peerj.8730)
Supplement: Table S4 — Abbreviations: Log2 FC, Log2 fold change; OE, ovarian endometriosis. [file peerj-08-8730-s004.xlsx]

## Sheet: Sheet3
Table S2. The expression of genes enriched both in ‘pathways in cancer’ and ‘PI3K-Akt signaling pathway’ in OE in the microarray training dataset and OE RNA-sequencing validation dataset GSE105764.
		OE RNA-sequencing dataset GSE105764		The merged OE dataset of GSE7305 and GSE7307
Gene Symbol	Enriched Pathways	Log2FC	P-Value	Log2FC	P-Value
FGFR2	PI3K-Akt signaling pathway, Pathways in cancer, Rap1 signaling pathway	-2.48427	1.0738e-23	-2.27258	3.8609e-23
PIK3R1	PI3K-Akt signaling pathway, Pathways in cancer, Rap1 signaling pathway, TNF signaling pathway	-2.00704	1.80541e-19	-1.10281	4.7653e-15
MET	PI3K-Akt signaling pathway, Pathways in cancer, Rap1 signaling pathway	-3.9938	2.36872e-17	-2.28678	1.9107e-15
KIT	PI3K-Akt signaling pathway, Pathways in cancer, Ovarian steroidogenesis	2.16462	3.27567e-17	1.2723	2.67211e-09
GNG2	PI3K-Akt signaling pathway, Pathways in cancer	2.36745	1.32208e-12	1.41427	9.08624e-11
FN1	PI3K-Akt signaling pathway, Pathways in cancer	2.56141	1.89541e-10	1.50661	1.00927e-12
ITGA6	PI3K-Akt signaling pathway, Pathways in cancer, Cell adhesion molecules (CAMs)	-1.51794	3.34358e-09	-1.67122	3.03767e-16
VEGFA	PI3K-Akt signaling pathway, Pathways in cancer, Rap1 signaling pathway, Complement and coagulation cascades	-1.90765	8.01465e-07	-1.72897	1.22808e-10
CCND1	PI3K-Akt signaling pathway, Pathways in cancer	-1.02488	0.000124611	-1.18359	5.71713e-07
FGFR3	PI3K-Akt signaling pathway, Pathways in cancer, Rap1 signaling pathway, Rheumatoid arthritis	-1.59674	0.00062891	-1.78381	5.77244e-13
PDGFRA	PI3K-Akt signaling pathway, Pathways in cancer, Rap1 signaling pathway	0.721834	0.0071294	1.30318	1.94233e-10
LPAR1	PI3K-Akt signaling pathway, Pathways in cancer, Rap1 signaling pathway	-0.545307	0.0115023	-1.00569	6.18955e-11
PTGS2	PI3K-Akt signaling pathway, Pathways in cancer, TNF signaling pathway	1.49954	0.0211102	1.18864	0.000423004
GNG4	PI3K-Akt signaling pathway, Pathways in cancer	0.947737	0.0863562	1.4431	1.19852e-11
IGF1	PI3K-Akt signaling pathway, Pathways in cancer, Rap1 signaling pathway, Ovarian steroidogenesis	-0.673337	0.124362	-1.65937	5.34224e-09
CDKN1A	PI3K-Akt signaling pathway, Pathways in cancer	-0.233112	0.425854	1.12188	1.73858e-10
FGF9	PI3K-Akt signaling pathway, Pathways in cancer, Rap1 signaling pathway, Ras signaling pathway	-0.422823	0.511133	-1.12981	6.52955e-05
FGF13	PI3K-Akt signaling pathway, Pathways in cancer, Rap1 signaling pathway	-0.164577	0.625365	-1.06111	3.02136e-09
Abbreviations: Log2 FC, Log2 fold change; OE, ovarian endometriosis.
